# Supplementary material for: Effects of remote ischemic postconditioning on the pro-inflammatory neutrophils of peripheral blood in acute cerebral infarction
Source: publisher site journal article supplement (doi:10.18632/aging.204751), 2023-05-30
Supplement: Supplementary file [file aging-v15i10-204751-supplementary-material-SD1.pdf]

SUPPLEMENTARY FIGURE

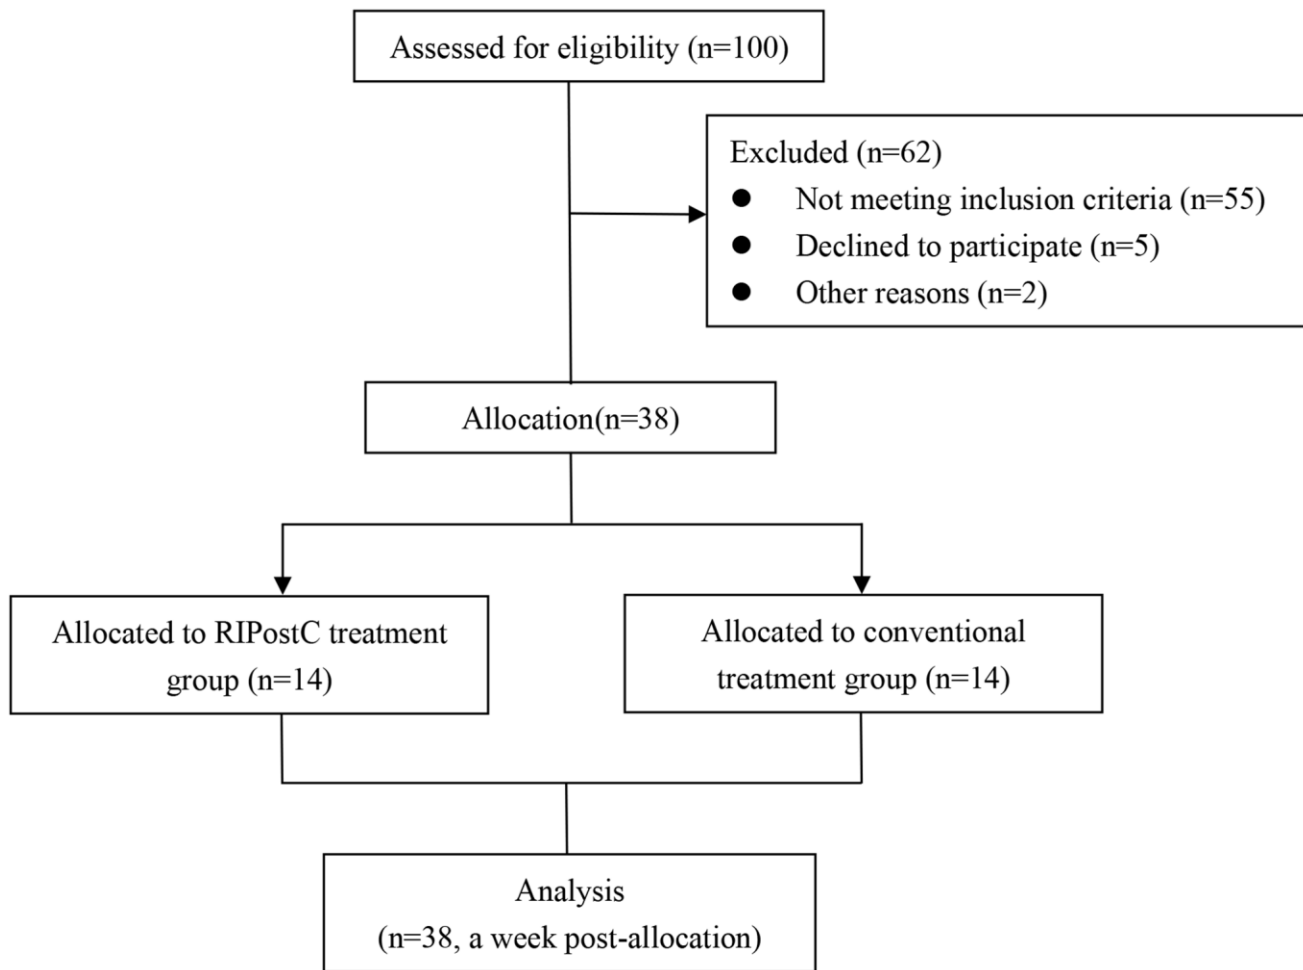

Supplementary Figure 1. CONSORT-style flowchart of the study.
